# Supplementary material
Source: PubMed Central journal article supplement (PMC4507154)
Supplement: bph0172-3484-sd1.pdf [file bph0172-3484-sd1.pdf]

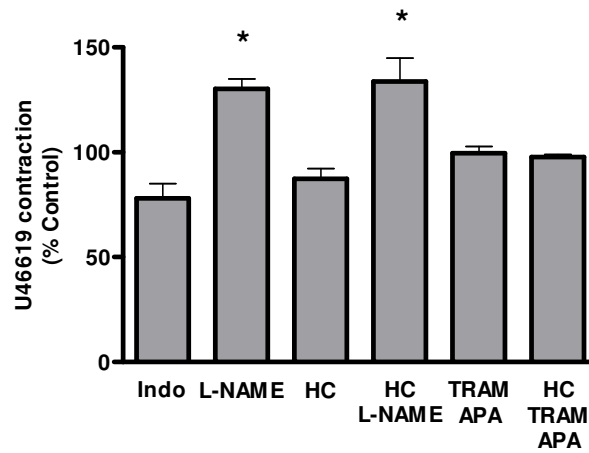

**Supplemental Figure 1.** Regulation of U46619-induced contraction by endothelial signaling inhibitors. Indomethacin (10  $\mu$ M, n = 6), L-NAME (100  $\mu$ M, n = 5), HC-067047 (100 nM, n = 6), HC-067047 plus L-NAME (n = 5), TRAM-34 plus apamin (1  $\mu$ M each, n = 6), or HC-067047 plus TRAM-34/apamin (n = 6). \*P<0.05 vs control.

**Supplemental Table 1.** Relaxation rate (tau) of eugenol-induced relaxation alone and in presence of L-NAME (100  $\mu$ M), HC-067047 (100 nM), HC-067047 plus L-NAME, TRAM-34 plus apamin (1  $\mu$ M each), or HC-067047 plus TRAM-34/apamin in the same arteries.

|                                   | Tau (s)        |                         | n |
|-----------------------------------|----------------|-------------------------|---|
|                                   | Eugenol        | Eugenol + Inhibitor (s) |   |
| <b>L-NAME</b>                     | 11.9 $\pm$ 2.6 | 7.8 $\pm$ 1.4           | 5 |
| <b>HC-067047</b>                  | 12.0 $\pm$ 3.0 | 7.0 $\pm$ 1.6           | 6 |
| <b>HC-067047 + L-NAME</b>         | 12.3 $\pm$ 2.7 | 8.4 $\pm$ 1.5           | 5 |
| <b>TRAM-34/Apamin</b>             | 9.8 $\pm$ 2.7  | 7.2 $\pm$ 1.2           | 6 |
| <b>HC-067047 + TRAM-34/Apamin</b> | 14.2 $\pm$ 3.7 | 12.2 $\pm$ 4.5          | 6 |
